# Supplementary material for: Origanum vulgare Essential Oil against Tenebrio molitor (Coleoptera: Tenebrionidae): Composition, Insecticidal Activity, and Behavioral Response
Source: MDPI journal article supplement (doi:10.3390/plants10112513), 2021-11-19
Supplement: s1 [file s1]

## Supplementary material

### Table S1: Raw data

#### Experiment 1. Dose-response relationship

| Dose | No. insects | Larva | Pupa | Adult |
|------|-------------|-------|------|-------|
| 0    | 150         | 0     | 0    | 0     |
| 1.56 | 150         | 12    | 9    | 18    |
| 3.12 | 150         | 48    | 27   | 36    |
| 6.25 | 150         | 96    | 54   | 54    |
| 12.5 | 150         | 126   | 108  | 72    |
| 25   | 150         | 150   | 126  | 108   |
| 60   | 150         | 150   | 150  | 144   |

#### Experiment 2. Time-mortality relationship

Larva

| Time (Hours) | Control | Time (Hours) | LD25= 1.77 mg insect-1 | Time (Hours) | LD50= 3.03 mg insect-1 | Time (Hours) | LD75= 5.21 mg insect-1 | Time (Hours) | LD90= 8.48 mg insect-1 |
|--------------|---------|--------------|------------------------|--------------|------------------------|--------------|------------------------|--------------|------------------------|
| 0            | 0       | 0            | 0                      | 0            | 0                      | 0            | 0                      | 0            | 0                      |
| 6            | 0       | 6            | 0                      | 6            | 0                      | 6            | 1                      | 6            | 1                      |
| 6            | 0       | 6            | 0                      | 6            | 0                      | 6            | 1                      | 6            | 0                      |
| 6            | 0       | 6            | 0                      | 6            | 0                      | 6            | 0                      | 6            | 0                      |
| 12           | 0       | 12           | 0                      | 12           | 0                      | 12           | 0                      | 12           | 1                      |
| 12           | 0       | 12           | 0                      | 12           | 0                      | 12           | 1                      | 12           | 0                      |
| 12           | 0       | 12           | 0                      | 12           | 0                      | 12           | 0                      | 12           | 1                      |
| 18           | 0       | 18           | 0                      | 18           | 0                      | 18           | 0                      | 18           | 0                      |
| 18           | 0       | 18           | 0                      | 18           | 1                      | 18           | 0                      | 18           | 0                      |
| 18           | 0       | 18           | 0                      | 18           | 0                      | 18           | 1                      | 18           | 0                      |
| 24           | 0       | 24           | 0                      | 24           | 1                      | 24           | 1                      | 24           | 1                      |
| 24           | 0       | 24           | 0                      | 24           | 1                      | 24           | 1                      | 24           | 1                      |
| 24           | 0       | 24           | 0                      | 24           | 1                      | 24           | 1                      | 24           | 0                      |
| 30           | 0       | 30           | 1                      | 30           | 1                      | 30           | 1                      | 30           | 1                      |
| 30           | 0       | 30           | 1                      | 30           | 0                      | 30           | 0                      | 30           | 1                      |
| 30           | 0       | 30           | 1                      | 30           | 0                      | 30           | 1                      | 30           | 1                      |
| 36           | 0       | 36           | 1                      | 36           | 0                      | 36           | 0                      | 36           | 1                      |
| 36           | 0       | 36           | 0                      | 36           | 1                      | 36           | 1                      | 36           | 1                      |
| 36           | 0       | 36           | 0                      | 36           | 1                      | 36           | 1                      | 36           | 1                      |
| 42           | 0       | 42           | 0                      | 42           | 0                      | 42           | 0                      | 42           | 1                      |
| 42           | 0       | 42           | 1                      | 42           | 1                      | 42           | 1                      | 42           | 1                      |
| 42           | 0       | 42           | 0                      | 42           | 0                      | 42           | 1                      | 42           | 1                      |
| 48           | 0       | 48           | 0                      | 48           | 1                      | 48           | 1                      | 48           | 0                      |
| 48           | 0       | 48           | 0                      | 48           | 0                      | 48           | 1                      | 48           | 1                      |
| 48           | 0       | 48           | 0                      | 48           | 0                      | 48           | 0                      | 48           | 1                      |

## Pupa

| Time (Hours) | Control | Time (Hours) | LD25= 2.61 mg insect-1 | Time (Hours) | LD50= 5.01 mg insect-1 | Time (Hours) | LD75= 9.59 mg insect-1 | Time (Hours) | LD90= 17.2 mg insect-1 |
|--------------|---------|--------------|------------------------|--------------|------------------------|--------------|------------------------|--------------|------------------------|
| 0            | 0       | 0            | 0                      | 0            | 0                      | 0            | 0                      | 0            | 0                      |
| 6            | 0       | 6            | 0                      | 6            | 0                      | 6            | 0                      | 6            | 1                      |
| 6            | 0       | 6            | 0                      | 6            | 0                      | 6            | 1                      | 6            | 0                      |
| 6            | 0       | 6            | 0                      | 6            | 0                      | 6            | 0                      | 6            | 0                      |
| 12           | 0       | 12           | 0                      | 12           | 0                      | 12           | 0                      | 12           | 1                      |
| 12           | 0       | 12           | 0                      | 12           | 0                      | 12           | 1                      | 12           | 0                      |
| 12           | 0       | 12           | 0                      | 12           | 0                      | 12           | 1                      | 12           | 0                      |
| 18           | 0       | 18           | 1                      | 18           | 0                      | 18           | 0                      | 18           | 0                      |
| 18           | 0       | 18           | 0                      | 18           | 1                      | 18           | 0                      | 18           | 1                      |
| 18           | 0       | 18           | 0                      | 18           | 0                      | 18           | 1                      | 18           | 0                      |
| 24           | 0       | 24           | 1                      | 24           | 1                      | 24           | 1                      | 24           | 1                      |
| 24           | 0       | 24           | 0                      | 24           | 1                      | 24           | 0                      | 24           | 1                      |
| 24           | 0       | 24           | 0                      | 24           | 1                      | 24           | 1                      | 24           | 0                      |
| 30           | 0       | 30           | 1                      | 30           | 1                      | 30           | 1                      | 30           | 1                      |
| 30           | 0       | 30           | 0                      | 30           | 0                      | 30           | 0                      | 30           | 0                      |
| 30           | 0       | 30           | 1                      | 30           | 0                      | 30           | 1                      | 30           | 1                      |
| 36           | 0       | 36           | 0                      | 36           | 0                      | 36           | 0                      | 36           | 1                      |
| 36           | 0       | 36           | 1                      | 36           | 1                      | 36           | 1                      | 36           | 1                      |
| 36           | 0       | 36           | 0                      | 36           | 1                      | 36           | 1                      | 36           | 0                      |
| 42           | 0       | 42           | 0                      | 42           | 0                      | 42           | 0                      | 42           | 1                      |
| 42           | 0       | 42           | 0                      | 42           | 1                      | 42           | 1                      | 42           | 1                      |
| 42           | 0       | 42           | 0                      | 42           | 0                      | 42           | 1                      | 42           | 1                      |
| 48           | 0       | 48           | 0                      | 48           | 0                      | 48           | 1                      | 48           | 1                      |
| 48           | 0       | 48           | 0                      | 48           | 0                      | 48           | 1                      | 48           | 1                      |
| 48           | 0       | 48           | 0                      | 48           | 0                      | 48           | 0                      | 48           | 1                      |

## Adult

| Time (Hours) | Control | Time (Hours) | LD25= 2.61 mg insect-1 | Time (Hours) | LD50= 5.01 mg insect-1 | Time (Hours) | LD75= 9.59 mg insect-1 | Time (Hours) | LD90= 17.2 mg insect-1 |
|--------------|---------|--------------|------------------------|--------------|------------------------|--------------|------------------------|--------------|------------------------|
| 0            | 0       | 0            | 0                      | 0            | 0                      | 0            | 0                      | 0            | 0                      |
| 6            | 0       | 6            | 0                      | 6            | 0                      | 6            | 0                      | 6            | 1                      |
| 6            | 0       | 6            | 0                      | 6            | 0                      | 6            | 1                      | 6            | 0                      |
| 6            | 0       | 6            | 0                      | 6            | 0                      | 6            | 0                      | 6            | 1                      |
| 12           | 0       | 12           | 0                      | 12           | 0                      | 12           | 0                      | 12           | 1                      |
| 12           | 0       | 12           | 0                      | 12           | 0                      | 12           | 1                      | 12           | 0                      |
| 12           | 0       | 12           | 0                      | 12           | 0                      | 12           | 0                      | 12           | 0                      |
| 18           | 0       | 18           | 1                      | 18           | 0                      | 18           | 0                      | 18           | 1                      |
| 18           | 0       | 18           | 0                      | 18           | 1                      | 18           | 0                      | 18           | 1                      |
| 18           | 0       | 18           | 0                      | 18           | 0                      | 18           | 1                      | 18           | 0                      |
| 24           | 0       | 24           | 1                      | 24           | 1                      | 24           | 1                      | 24           | 1                      |
| 24           | 0       | 24           | 0                      | 24           | 0                      | 24           | 0                      | 24           | 1                      |

|    |   |    |   |    |   |    |   |    |   |
|----|---|----|---|----|---|----|---|----|---|
| 24 | 0 | 24 | 0 | 24 | 1 | 24 | 1 | 24 | 0 |
| 30 | 0 | 30 | 1 | 30 | 1 | 30 | 0 | 30 | 1 |
| 30 | 0 | 30 | 0 | 30 | 0 | 30 | 0 | 30 | 0 |
| 30 | 0 | 30 | 1 | 30 | 0 | 30 | 1 | 30 | 1 |
| 36 | 0 | 36 | 0 | 36 | 0 | 36 | 0 | 36 | 0 |
| 36 | 0 | 36 | 1 | 36 | 1 | 36 | 1 | 36 | 1 |
| 36 | 0 | 36 | 0 | 36 | 1 | 36 | 1 | 36 | 0 |
| 42 | 0 | 42 | 0 | 42 | 0 | 42 | 0 | 42 | 0 |
| 42 | 0 | 42 | 1 | 42 | 1 | 42 | 1 | 42 | 1 |
| 42 | 0 | 42 | 0 | 42 | 1 | 42 | 1 | 42 | 1 |
| 48 | 0 | 48 | 0 | 48 | 0 | 48 | 0 | 48 | 1 |
| 48 | 0 | 48 | 0 | 48 | 0 | 48 | 1 | 48 | 1 |
| 48 | 0 | 48 | 0 | 48 | 0 | 48 | 0 | 48 | 1 |

### Experiment 3. Respiration rate

|       |         | Time | 1        | 2        |      |         | Time | 1        | 2        |       |         | Time | 1        | 2        |
|-------|---------|------|----------|----------|------|---------|------|----------|----------|-------|---------|------|----------|----------|
|       |         | 1    | 10.93499 | 10.7203  |      |         | 1    | 13.66817 | 12.75116 |       |         | 1    | 16.76968 | 12.44762 |
|       |         | 2    | 11.65901 | 10.41823 |      |         | 2    | 12.1487  | 11.22211 |       |         | 2    | 23.24817 | 12.11786 |
|       |         | 3    | 12.99605 | 9.921778 |      |         | 3    | 13.86393 | 12.77051 |       |         | 3    | 22.17932 | 16.13709 |
|       |         | 4    | 12.72641 | 11.70785 |      |         | 4    | 13.9932  | 12.35241 |       |         | 4    | 23.29368 | 40.388   |
|       | Control | 5    | 11.56222 | 10.08194 |      | Control | 5    | 13.3423  | 12.71475 |       | Control | 5    | 17.12949 | 15.62743 |
|       |         | 6    | 10.72369 | 9.582174 |      |         | 6    | 13.67985 | 12.55413 |       |         | 6    | 23.24817 | 22.11786 |
|       |         | 7    | 11.96486 | 10.4163  |      |         | 7    | 15.95317 | 13.95303 |       |         | 7    | 22.17932 | 21.13709 |
|       |         | 8    | 10.07715 | 9.049567 |      |         | 8    | 16.38126 | 15.08759 |       |         | 8    | 18.29368 | 15.388   |
|       |         | 9    | 10.72369 | 9.582174 |      |         | 9    | 14.12882 | 12.92571 |       |         | 9    | 17.12949 | 15.62743 |
| Larva |         | 10   | 12.65424 | 10.07938 | Pupa |         | 10   | 14.87882 | 13.39577 | Adult |         | 10   | 23.29368 | 20.388   |
|       |         | 1    | 9.033552 | 6.566706 |      |         | 1    | 12.58427 | 8.745387 |       |         | 1    | 17.86737 | 16.58476 |
|       |         | 2    | 7.141409 | 5.40112  |      |         | 2    | 11.65592 | 10.29434 |       |         | 2    | 21.26543 | 19.82936 |
|       |         | 3    | 5.997087 | 3.97808  |      |         | 3    | 13.8437  | 11.05058 |       |         | 3    | 15.35273 | 13.62493 |
|       |         | 4    | 7.978933 | 6.817453 |      |         | 4    | 13.26475 | 9.833053 |       |         | 4    | 23.06597 | 20.23583 |
|       | LD50    | 5    | 8.985889 | 7.749089 |      | LD50    | 5    | 13.11583 | 12.34802 |       | LD50    | 5    | 19.25355 | 16.62393 |
|       |         | 6    | 9.957933 | 9.118033 |      |         | 6    | 13.03703 | 9.53633  |       |         | 6    | 23.95367 | 22.00735 |
|       |         | 7    | 7.141409 | 5.40112  |      |         | 7    | 13.60626 | 12.67686 |       |         | 7    | 21.8554  | 22.23967 |
|       |         | 8    | 8.985889 | 7.749089 |      |         | 8    | 12.46079 | 11.61942 |       |         | 8    | 21.43438 | 19.57032 |
|       |         | 9    | 9.957933 | 9.118033 |      |         | 9    | 12.94607 | 10.763   |       |         | 9    | 17.66755 | 12.76333 |
|       |         | 10   | 7.745417 | 7.100277 |      |         | 10   | 14.32107 | 12.888   |       |         | 10   | 19.3482  | 14.3482  |
|       |         | 1    | 5.823067 | 5.10997  |      |         | 1    | 10.15618 | 9.285595 |       |         | 1    | 19.71705 | 13.67635 |
|       |         | 2    | 5.796144 | 5.11961  |      |         | 2    | 11.39505 | 9.2904   |       |         | 2    | 17.00313 | 15.10894 |
|       |         | 3    | 4.609667 | 3.629132 |      |         | 3    | 9.549889 | 6.986499 |       |         | 3    | 16.78693 | 14.5629  |
|       |         | 4    | 4.573733 | 3.774144 |      |         | 4    | 9.999966 | 6.067473 |       |         | 4    | 19.93485 | 18.74285 |
|       | LD90    | 5    | 5.794833 | 4.748593 |      | LD90    | 5    | 10.21482 | 7.542058 |       | LD90    | 5    | 18.13547 | 12.64297 |

|  |  |    |          |          |  |  |    |          |          |  |  |    |          |          |
|--|--|----|----------|----------|--|--|----|----------|----------|--|--|----|----------|----------|
|  |  | 6  | 5.5329   | 5.08252  |  |  | 6  | 12.23908 | 6.84803  |  |  | 6  | 18.77657 | 12.46413 |
|  |  | 7  | 5.796144 | 5.11961  |  |  | 7  | 9.200382 | 8.507185 |  |  | 7  | 17.95173 | 14.85157 |
|  |  | 8  | 5.794833 | 4.748593 |  |  | 8  | 10.83221 | 6.812687 |  |  | 8  | 16.46793 | 10.53803 |
|  |  | 9  | 5.5329   | 5.08252  |  |  | 9  | 10.44845 | 7.667491 |  |  | 9  | 16.55983 | 10.97542 |
|  |  | 10 | 5.997087 | 3.97808  |  |  | 10 | 8.335946 | 6.529991 |  |  | 10 | 18.92193 | 16.62393 |

## Experiment 4: Behavioral avoidance response

### Larva

| Resting time |       |      | Walked distance |       |       | Walking velocity |          |          |
|--------------|-------|------|-----------------|-------|-------|------------------|----------|----------|
| Control      | LD50  | LD90 | Control         | LD50  | LD90  | Control          | LD50     | LD90     |
| 231          | 20.4  | 52.4 | 211.8           | 283.1 | 303.1 | 0.916883         | 1.387745 | 2.578435 |
| 258          | 73.9  | 10.7 | 214.7           | 243.2 | 321.8 | 0.832171         | 0.329093 | 3.007477 |
| 346.7        | 18.7  | 51.2 | 267.7           | 308.4 | 392.2 | 0.772137         | 1.649198 | 2.766016 |
| 265.4        | 32.4  | 5.6  | 198.6           | 332   | 380.6 | 0.748304         | 1.024691 | 2.796429 |
| 245.5        | 50.2  | 25.8 | 205.3           | 302.5 | 356.1 | 0.836253         | 0.60259  | 2.380233 |
| 328.4        | 62.4  | 52.4 | 245.3           | 335.3 | 392.1 | 0.746955         | 0.53734  | 2.748282 |
| 363          | 32.9  | 10.7 | 225.9           | 258.9 | 316.3 | 0.622314         | 0.78693  | 2.956075 |
| 277.3        | 135.8 | 51.2 | 298.1           | 299.9 | 418.4 | 1.075009         | 0.220839 | 2.817188 |
| 316          | 51.9  | 5.6  | 261.4           | 208.1 | 433.8 | 0.827215         | 0.400963 | 3.746429 |
| 140.1        | 72    | 25.8 | 235.3           | 394.7 | 472.4 | 1.679515         | 0.548194 | 1.831008 |
| 366.1        | 50.1  | 30.8 | 231.7           | 340.8 | 369.7 | 0.632887         | 0.68024  | 2.200325 |
| 230.9        | 12.2  | 52.4 | 245.1           | 228   | 358.2 | 1.061498         | 1.868852 | 2.683588 |
| 283.6        | 74.9  | 10.7 | 173.9           | 321.2 | 308.4 | 0.613188         | 0.428838 | 2.882243 |
| 198.9        | 50.2  | 51.2 | 173.7           | 295.8 | 374.4 | 0.873303         | 0.589243 | 2.73125  |
| 210.8        | 73.8  | 5.6  | 171.3           | 366.1 | 458.8 | 0.812619         | 0.49607  | 2.192857 |
| 273.8        | 9.3   | 25.8 | 182.3           | 282.2 | 303.1 | 0.665814         | 3.034409 | 1.82093  |

### Adult

| Resting time |       |       | Walked distance |       |       | Walking velocity |          |          |
|--------------|-------|-------|-----------------|-------|-------|------------------|----------|----------|
| Control      | LD50  | LD90  | Control         | LD50  | LD90  | Control          | LD50     | LD90     |
| 231          | 248.4 | 105.8 | 330             | 379.5 | 554.4 | 1.428571         | 1.527778 | 2.328922 |
| 258          | 202.8 | 125.5 | 243             | 360.1 | 566.2 | 0.94186          | 1.775641 | 2.005135 |
| 246.7        | 105.6 | 174.8 | 301.2           | 385.9 | 511.2 | 1.220916         | 3.654356 | 1.299771 |
| 265.4        | 244.9 | 101.9 | 252.1           | 352.4 | 574.4 | 0.949887         | 1.438955 | 2.505288 |
| 245.5        | 271.9 | 128.3 | 300.8           | 317.4 | 500.9 | 1.225255         | 1.167341 | 1.735169 |
| 228.4        | 170.6 | 137.5 | 315             | 336   | 587.1 | 1.379159         | 1.969519 | 1.897697 |
| 263          | 243   | 145.1 | 275.2           | 389.9 | 524   | 1.046388         | 1.604527 | 1.605023 |
| 277.3        | 182.2 | 65.1  | 291.7           | 382.3 | 546.5 | 1.051929         | 2.098244 | 3.731012 |
| 216          | 142.5 | 72.6  | 335             | 348.4 | 501.2 | 1.550926         | 2.444912 | 3.068258 |
| 240.1        | 213.2 | 135.7 | 269.3           | 325.4 | 562.2 | 1.121616         | 1.526266 | 1.841317 |
| 212.1        | 336.6 | 192.5 | 339.1           | 316.1 | 528.1 | 1.598774         | 0.939097 | 1.219278 |
| 208.4        | 138.3 | 158.4 | 286.4           | 385.9 | 559.9 | 1.37428          | 2.790311 | 1.570988 |

|       |       |       |       |       |       |          |          |          |
|-------|-------|-------|-------|-------|-------|----------|----------|----------|
| 233.8 | 205.1 | 67.5  | 261.7 | 351.7 | 563.4 | 1.119333 | 1.714773 | 3.70963  |
| 263.6 | 172   | 86.4  | 265   | 312.2 | 575.6 | 1.005311 | 1.815116 | 2.960905 |
| 256.2 | 157.2 | 190.6 | 259.7 | 336   | 581   | 1.013661 | 2.137405 | 1.354786 |
| 200.3 | 160.1 | 168.3 | 233.7 | 389.9 | 506.5 | 1.16675  | 2.435353 | 1.337559 |
